# Supplementary material for: Effect of silver nanoparticle embedment on the frequency dispersive conductivity and electrical relaxation dynamics in dodecylbenzenesulfonic acid-doped polyaniline
Source: Springer Nature journal article supplement (doi:10.1007/s10853-014-8305-1), 2014-06-04
Supplement: MOESM1 [file 3525978]

**Supporting Information**

**Effect of silver nanoparticle embedment on the frequency dispersive conductivity and electrical relaxation dynamics in dodecylbenzenesulfonic acid doped polyaniline**

Swarup Biswas,† Bula Dutta‡ and Subhratanu Bhattacharya*†

† Department of Physics; University of Kalyani, Kalyani; Nadia-741235; West Bengal. India.

‡ Department of Chemistry; P. D. Women’s College; Jalpaiguri-735101; West Bengal. India


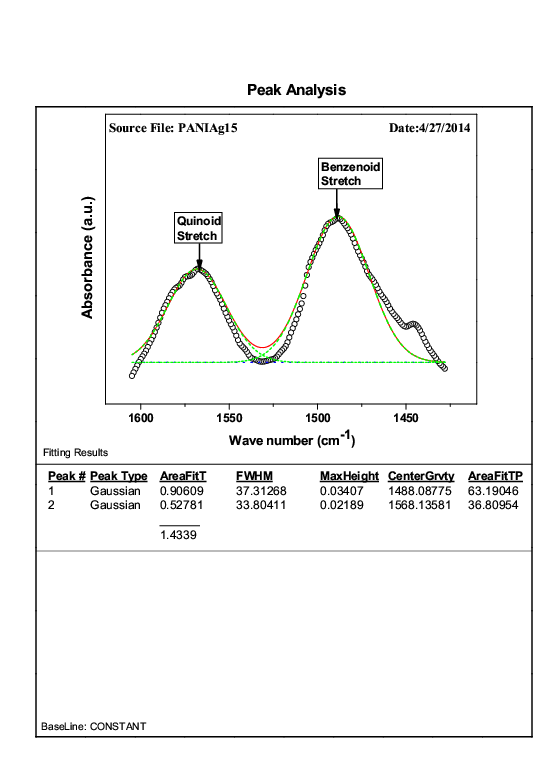


**Fig. S1** Gaussian fit of the FT-IR spectrum of a sample within the wave number range 1380 to 1620 cm-1 with the results.

**
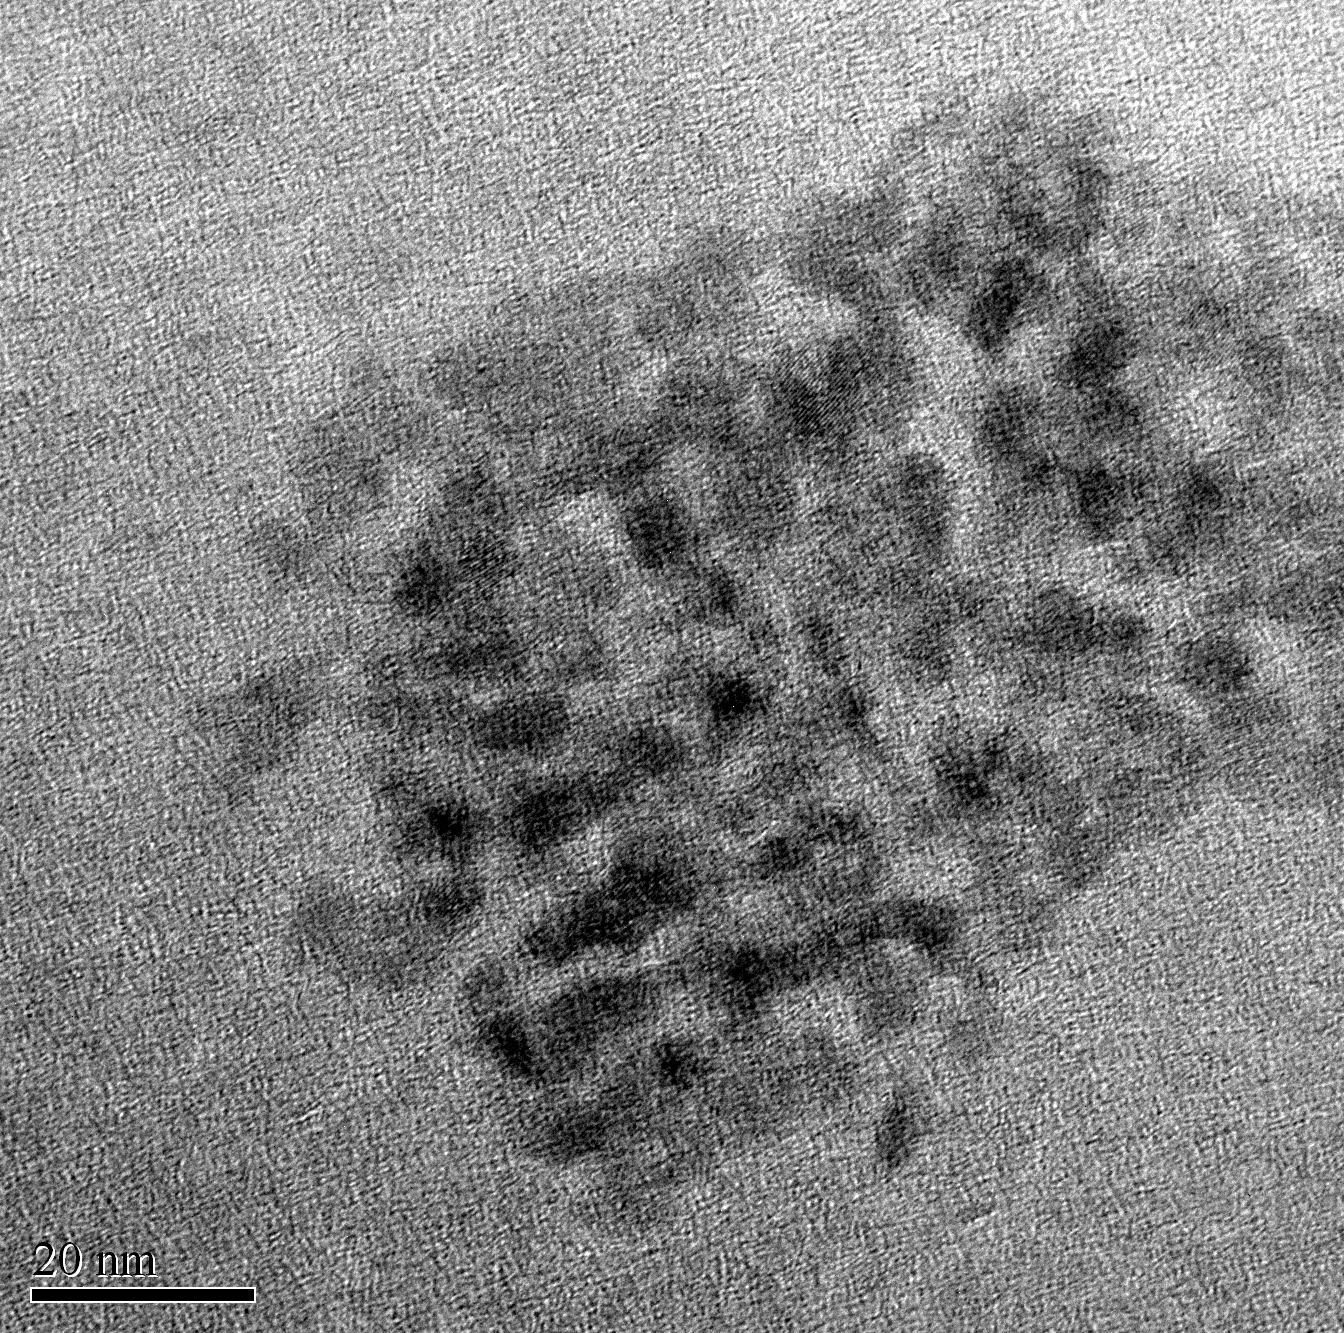
**

**Fig. S2** High resulation TEM micrograph of PANAg3 sample showing slight agglomaration of silver nanoparticles.
